# Supplementary material for: Engineering cobalt oxide by interfaces and pore architectures for enhanced electrocatalytic performance for overall water splitting
Source: Royal Society of Chemistry journal article supplement (doi:10.1039/d0nr02030c), 2020-01-01
Supplement: d0nr02030c1.pdf [file d0nr02030c1.pdf]

## Supporting Information

### Engineering Cobalt Oxide by Interfaces and Pore Architectures for Enhanced Electrocatalytic Performance for Overall Water Splitting

Lin-Fei Gu, Jun-Jia Chen, Tao Zhou, Xue-Feng Lu\* and Gao-Ren Li\*

*MOE Key Laboratory of Bioinorganic and Synthetic Chemistry, School of Chemistry, Sun Yat-Sen University, Guangzhou 510275, P.R. China*

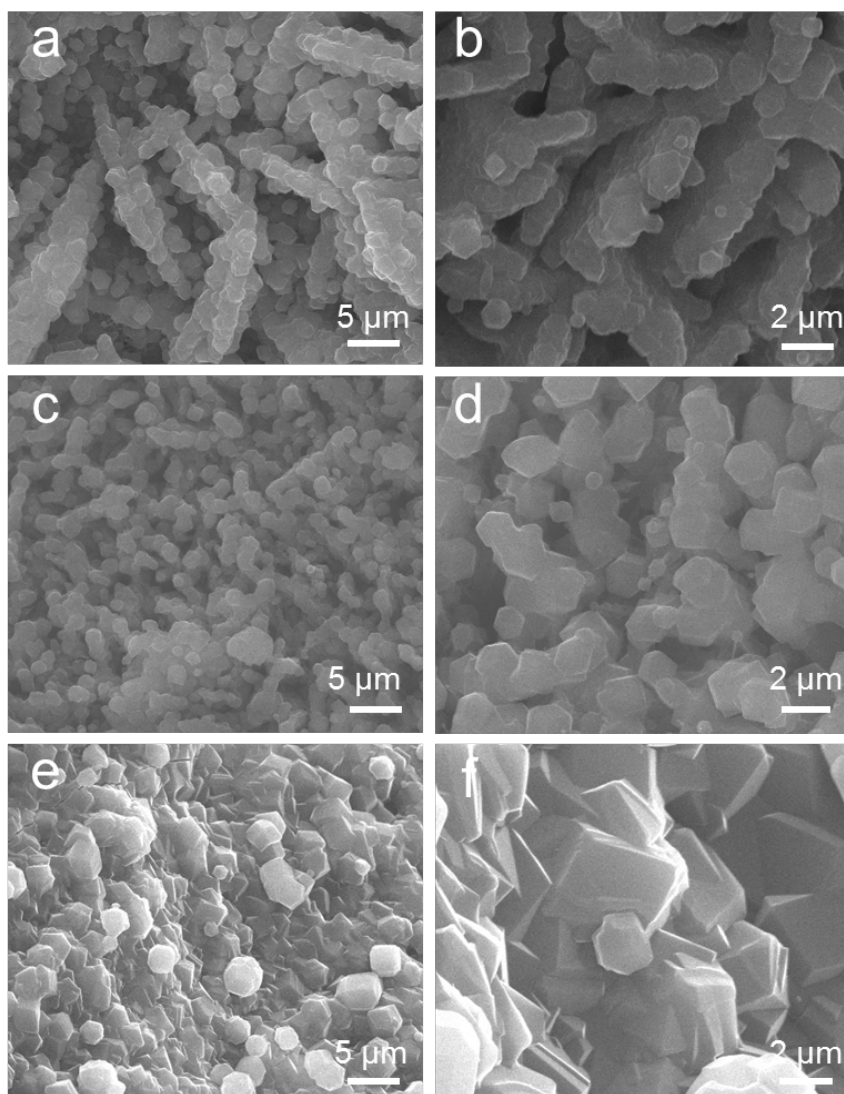

**Figure S1.** SEM images of Co<sub>2</sub>(OH)<sub>2</sub>CO<sub>3</sub>@ZIF-67 CSNSAs on Ni foam with different reaction time: (a-b) 6 h, (c-d) 8 h, and (e-f) 12 h.

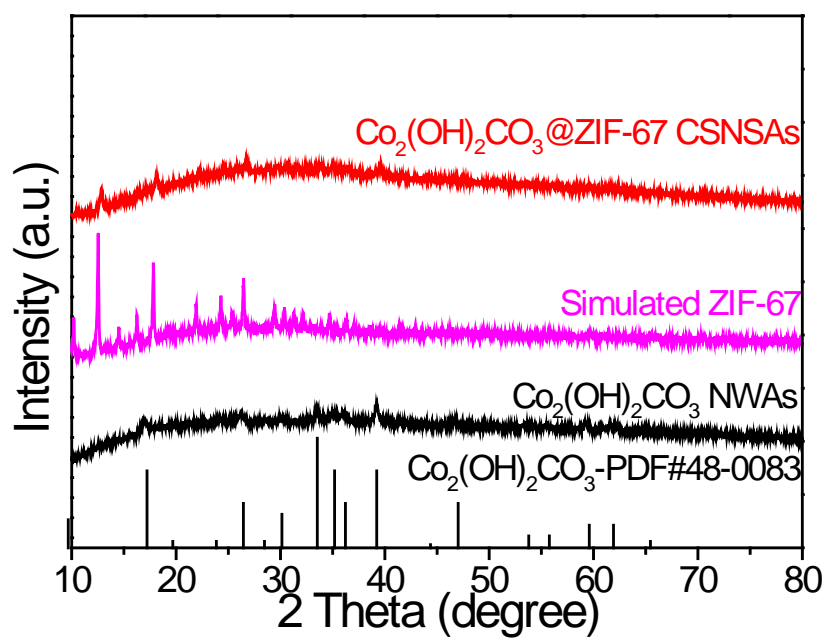

**Figure S2.** XRD patterns of  $\text{Co}_2(\text{OH})_2\text{CO}_3$  NWAs and  $\text{Co}_2(\text{OH})_2\text{CO}_3@ZIF-67$  CSNSAs.

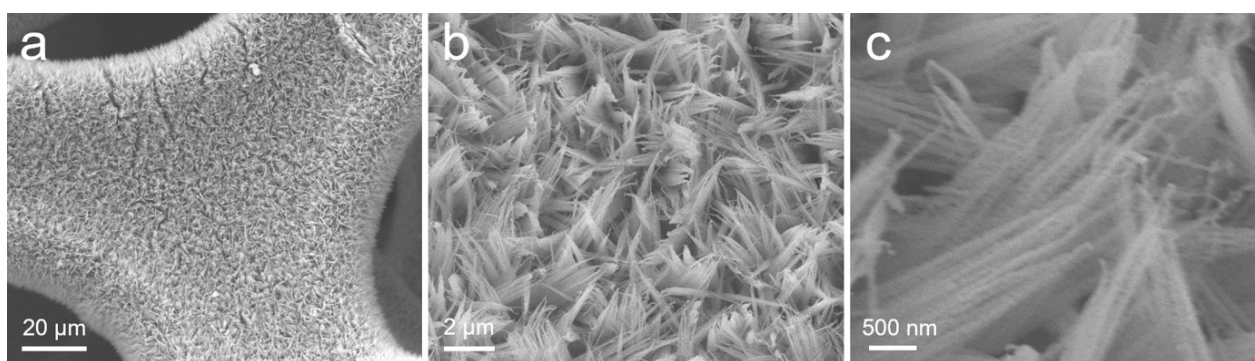

**Figure S3.** SEM images with different magnifications of mes-CoO NWAs on Ni foam.

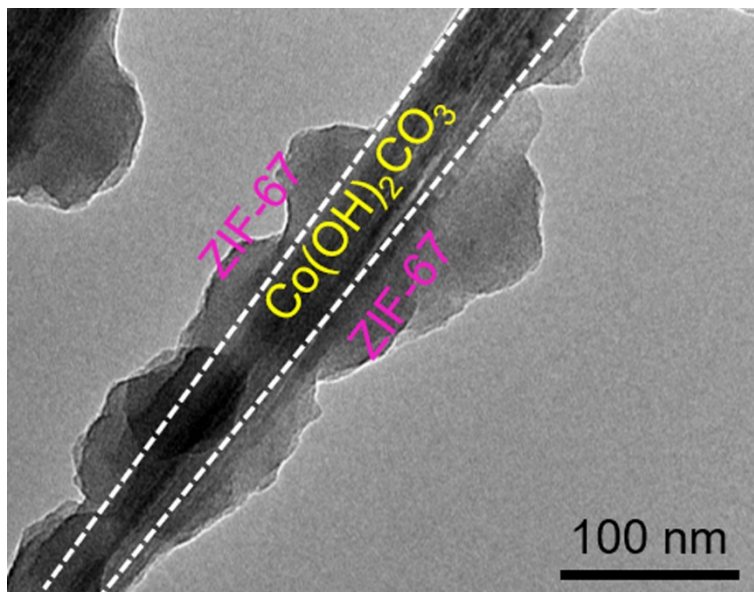

**Figure S4.** TEM image of a single core-shell structured  $\text{Co}_2(\text{OH})_2\text{CO}_3$ @ZIF-67 nanowire.

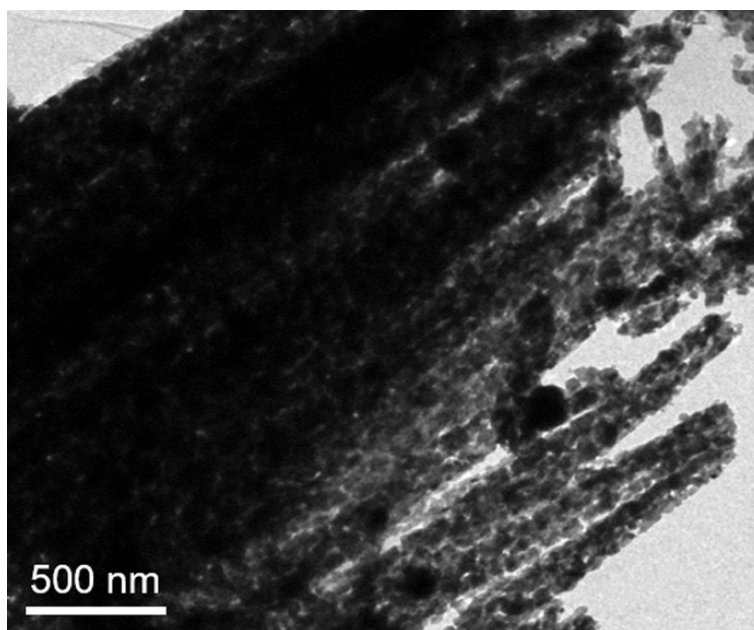

**Figure S5.** TEM image of mes-CoO NWAs.

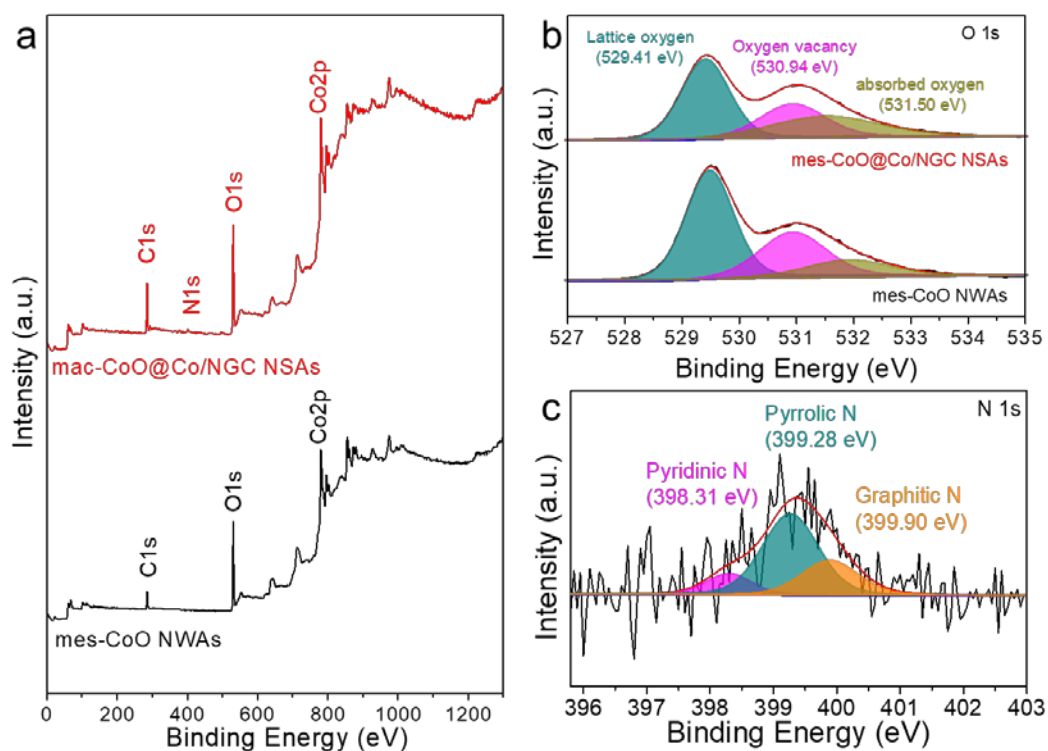

**Figure S6.** (a) XPS survey spectra of mes-CoO NWAs and mac-CoO@Co/NGC NSAs, and high resolution XPS spectra of (b) O 1s for mes-CoO NWAs and mac-CoO@Co/NGC NSAs, (c) N 1s for mac-CoO@Co/NGC NSAs.

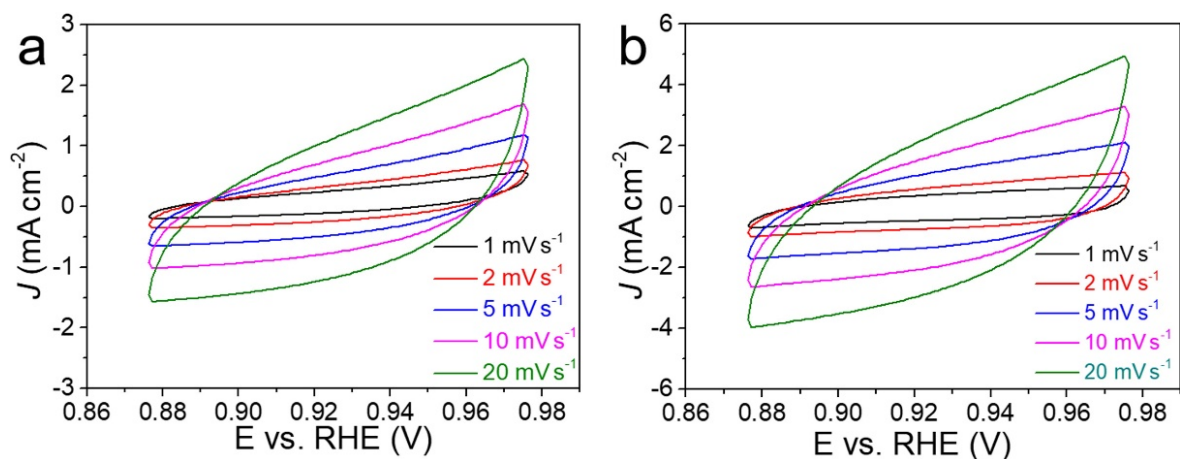

**Figure S7.** CVs of (a) mes-CoO NWAs and (b) mac-CoO@Co/NGC NSAs measured in 1.0 M KOH solution.

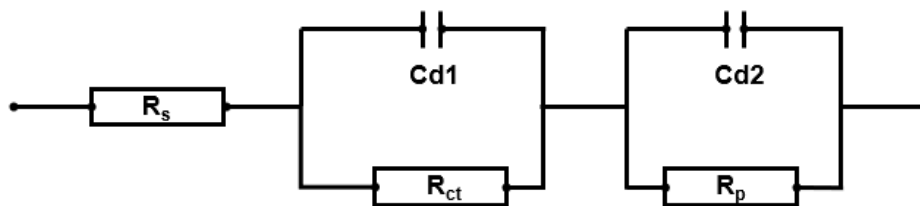

**Figure S8.** Equivalent circuit used for fitting the Nyquist plots, which consists of a series resistance  $R_s$  (the ohmic resistance) in series with two parallel branches: one reflecting the charge-transfer process ( $C_{d1}$ - $R_{ct}$ ) and the other related to the surface porosity ( $C_{d2}$ - $R_p$ ).

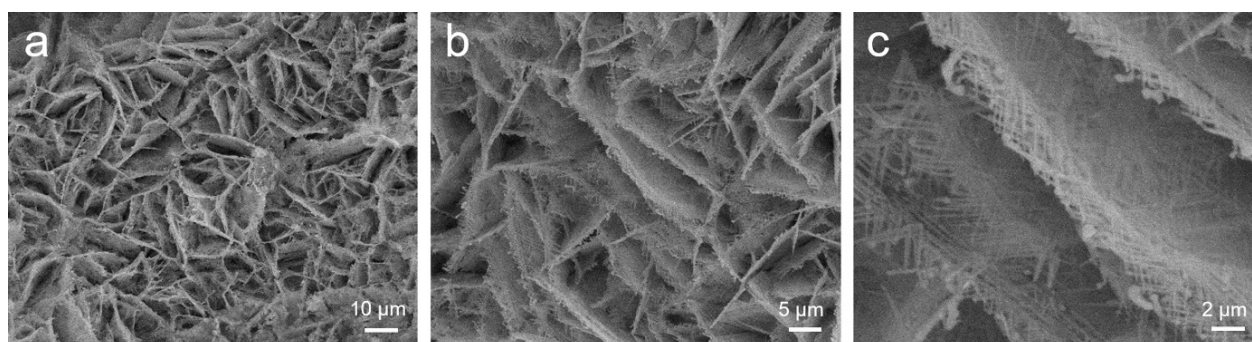

**Figure S9.** SEM images with different magnifications of mac-CoO@Co/NGC NSAs at anode for OER after full water splitting test for 35 h.

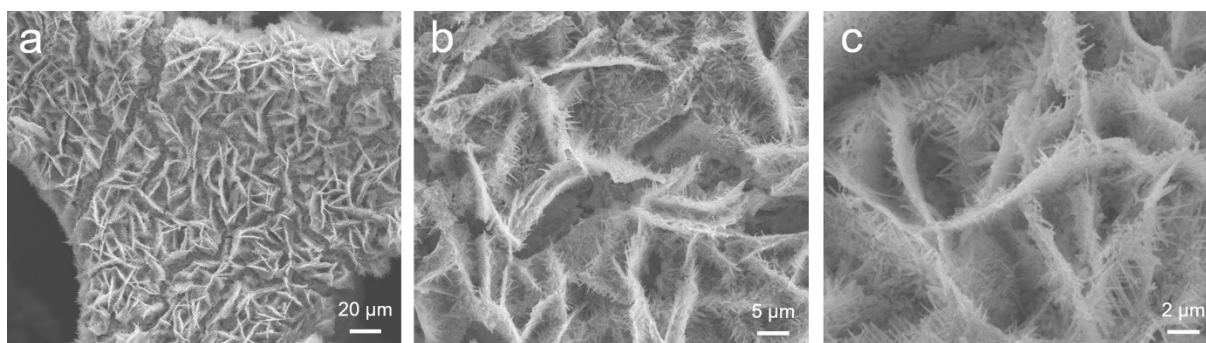

**Figure S10.** SEM images with different magnifications of mac-CoO@Co/NGC NSAs at cathode for HER after full water splitting test for 35 h.

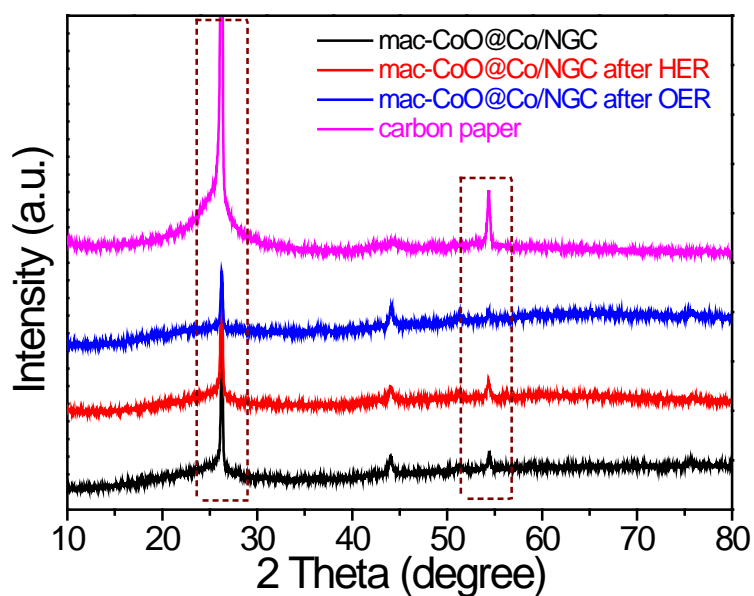

**Figure S11.** XRD patterns of mac-CoO@Co/NGC before and after electrolysis test. The peaks indicated by dotted line come from carbon paper electrode.

**Table S1.** Comparison of representative cobalt-based OER electrocatalysts in alkaline electrolyte (1.0 M KOH solution).

| Catalysts                                                                  | $\eta@J$<br>(mV@mA cm <sup>-2</sup> ) | Tafel slope<br>(mV dec <sup>-1</sup> ) | References                                                    |
|----------------------------------------------------------------------------|---------------------------------------|----------------------------------------|---------------------------------------------------------------|
| mac-CoO@Co/NGC NSAs                                                        | 300@50                                | 38                                     | This work                                                     |
| Co <sub>3</sub> O <sub>4</sub> /graphene                                   | 310@10                                | 67                                     | <i>Nat. Mater.</i> <b>2011</b> , <i>10</i> , 780              |
| Co <sub>3</sub> O <sub>4</sub> /C NWAs                                     | 290@10                                | 70                                     | <i>J. Am. Chem. Soc.</i> <b>2014</b> , <i>136</i> , 13925     |
| Co <sub>3</sub> O <sub>4</sub> /NiCo <sub>2</sub> O <sub>4</sub> nanocages | 340@10                                | 88                                     | <i>J. Am. Chem. Soc.</i> <b>2015</b> , <i>137</i> , 5590      |
| CoMn-LDH                                                                   | 324@10                                | 43                                     | <i>J. Am. Chem. Soc.</i> <b>2014</b> , <i>136</i> , 16481     |
| Zn <sub>x</sub> Co <sub>3-x</sub> O <sub>4</sub> NWAs                      | 320@10                                | 51                                     | <i>Chem. Mater.</i> <b>2014</b> , <i>26</i> , 1889            |
| Hollow Co <sub>3</sub> S <sub>4</sub> NSs                                  | 355@10                                | 40                                     | <i>Angew. Chem. Int. Ed.</i> <b>2015</b> , <i>127</i> , 11383 |
| CoCo LDH                                                                   | 380@10                                | 59                                     | <i>Nat. Commun.</i> <b>2014</b> , <i>5</i> , 4477             |
| N-doped graphene-CoO                                                       | 340@10                                | 67                                     | <i>Energy Environ. Sci.</i> <b>2014</b> , <i>7</i> , 609      |
| Co-PNCNFs                                                                  | 285@10                                | 73                                     | <i>J. Mater. Chem. A</i> <b>2016</b> , <i>4</i> , 12818       |
| Co@N-C                                                                     | 400@10                                | N.A.                                   | <i>J. Mater. Chem. A</i> <b>2014</b> , <i>2</i> , 20067       |
| Fe-Ni(OH) <sub>2</sub> /NF                                                 | 267@10                                | 51.5                                   | <i>Chem. Commun.</i> <b>2018</b> , <i>54</i> , 463            |
| Co(S <sub>x</sub> Se <sub>1-x</sub> ) <sub>2</sub>                         | 283@10                                | 65.6                                   | <i>Adv. Funct. Mater.</i> <b>2017</b> , <i>27</i> , 1701008   |
| CoFePO/NF                                                                  | 274.5@10                              | 51.7                                   | <i>ACS Nano</i> , <b>2016</b> , <i>10</i> , 8738              |
| F-Co <sub>2</sub> B                                                        | 320@10                                | 32                                     | <i>Energy Environ. Sci.</i> <b>2019</b> , <i>12</i> , 2443    |

**Table S2.** Comparison of representative cobalt-based HER electrocatalysts in alkaline electrolyte (1.0 M KOH solution).

| Catalysts                                  | $\eta@10 \text{ mA cm}^{-2}$<br>(mV) | Tafel slope<br>(mV dec <sup>-1</sup> ) | References                                                   |
|--------------------------------------------|--------------------------------------|----------------------------------------|--------------------------------------------------------------|
| mac-CoO@Co/NGC                             | 140                                  | 94                                     | This work                                                    |
| CoP/CC                                     | 67                                   | 129                                    | <i>J. Am. Chem. Soc.</i> <b>2014</b> , <i>136</i> , 7587     |
| CoO <sub>x</sub> @CN                       | 232                                  | N.A.                                   | <i>J. Am. Chem. Soc.</i> <b>2015</b> , <i>137</i> , 2688     |
| Co-P film                                  | 94                                   | 42                                     | <i>Angew. Chem. Int. Ed.</i> <b>2015</b> , <i>54</i> , 6251  |
| Co/N-doped carbon                          | 260                                  | 91                                     | <i>ACS Nano</i> <b>2016</b> , <i>10</i> , 684                |
| NiCo <sub>2</sub> S <sub>4</sub> nanowires | N.A.                                 | 141                                    | <i>Nanoscale</i> <b>2015</b> , <i>7</i> , 15122              |
| Co-PNCNFs                                  | 249                                  | 92                                     | <i>J. Mater. Chem. A</i> <b>2016</b> , <i>4</i> , 12818      |
| Co@CN                                      | 210                                  | 108                                    | <i>J. Mater. Chem. A</i> <b>2014</b> , <i>2</i> , 20067      |
| Co <sub>0.59</sub> Fe <sub>0.41</sub> P    | 99                                   | 72                                     | <i>Nanoscale</i> <b>2015</b> , <i>7</i> , 11055              |
| NiCoP/CNT                                  | 80                                   | 62                                     | <i>Electrochim. Acta.</i> <b>2017</b> , <i>252</i> , 101     |
| CoP <sub>2</sub> /RGO                      | 88                                   | 50                                     | <i>J. Mater. Chem. A.</i> <b>2016</b> , <i>4</i> , 4686      |
| Co-NRCNTs                                  | 370                                  | N.A.                                   | <i>Angew. Chem. Int. Ed.</i> <b>2014</b> , <i>53</i> , 4372  |
| CoP-MNAs                                   | 54                                   | 51                                     | <i>Adv. Funct. Mater.</i> <b>2015</b> , <i>25</i> , 7337     |
| Mo <sub>5</sub> N <sub>6</sub>             | 94                                   | 66                                     | <i>ACS Nano</i> <b>2018</b> , <i>12</i> , 12761              |
| Cu-CoP NRAs/CC                             | 81                                   | 102                                    | <i>ACS Appl. Energy Mater.</i> <b>2018</b> , <i>1</i> , 3835 |



**Table S3.** Comparison of overall water splitting performance of mac-CoO@Co/NGC NSAs with recently reported bi-functional electrocatalysts in alkaline electrolyte (1.0 M KOH solution).

| Catalysts                                  | $E_{J=10}$ (V) | References                                          |
|--------------------------------------------|----------------|-----------------------------------------------------|
| mac-CoO@Co/NGC NSAs                        | 1.62           | This Work                                           |
| CoO-CNF                                    | 1.63           | <i>Nat. Commun.</i> <b>2015</b> , 6, 7261           |
| CoP-MNA                                    | 1.62           | <i>Adv. Funct. Mater.</i> <b>2015</b> , 25, 7337    |
| Ni <sub>2</sub> P                          | 1.63           | <i>Energy Environ. Sci.</i> <b>2015</b> , 8, 2347   |
| NiSe-NWs                                   | 1.63           | <i>Angew. Chem. Int. Ed.</i> <b>2015</b> , 32, 9483 |
| NiFe-LDHs                                  | 1.7            | <i>Science</i> <b>2014</b> , 345, 1593              |
| Co <sub>3</sub> O <sub>4</sub> -MTAs       | 1.63           | <i>Angew. Chem. Int. Ed.</i> <b>2017</b> , 56, 1324 |
| Co-PNCNFs                                  | 1.66           | <i>J. Mater. Chem. A</i> <b>2016</b> , 4, 12818     |
| EG/Co <sub>0.85</sub> Se/NiFe-LDH          | 1.67           | <i>Energy Environ. Sci.</i> <b>2016</b> , 9, 478    |
| NiCo <sub>2</sub> O <sub>4</sub>           | 1.65           | <i>Angew. Chem. Int. Ed.</i> <b>2016</b> , 55, 6290 |
| CP/CTS/Co-S                                | 1.74           | <i>ACS Nano</i> <b>2016</b> , 10, 2342              |
| NiS/Ni foam                                | 1.64           | <i>Chem. Commun.</i> <b>2016</b> , 521, 486         |
| PNC/Co                                     | 1.64           | <i>J. Mater. Chem. A</i> <b>2016</b> , 4, 3204      |
| Co-P/NC                                    | 1.71           | <i>Chem. Mater.</i> <b>2015</b> , 27, 7636          |
| Co-Se1//Co-Se4                             | 1.84           | <i>Adv. Energy Mater.</i> <b>2018</b> , 8, 1801926  |
| MoS <sub>2</sub> /NiFe LDH<br>superlattice | 1.57           | <i>Nano Lett.</i> <b>2019</b> , 19, 4518            |
| Pt-CoS <sub>2</sub> /CC                    | 1.55           | <i>Adv. Energy Mater.</i> <b>2018</b> , 8, 1800935  |

$\eta$ : Overpotential (mV);

*J*: Current density ( $\text{mA cm}^{-2}$ );  
CNF: Carbon nanofiber;  
CNT: Carbon nanotube;  
MNA: Mesoporous nanorod arrays;  
NWs: Nanowires;  
MTAs: Microtube arrays;  
NWAs: Nanowire arrays;  
NRAs: Nanorod arrays;  
NSs: Nanosheets.  
PNCNFs: Porous nitrogen doped carbon nanofibers;  
NC/CN: N-doped carbon.  
CC: Carbon cloth;  
NRCNTs: Nitrogen-rich carbon nanotubes;  
MNAs: Mesoporous nanorod arrays.
